# Supplementary material
Source: publisher site journal article supplement (https://www.dovepress.com/article/536084)
Supplement: Supplementary file 1 [file 536084%20Supplementary%20file.docx]

## Appendix I Glossary of used key terms

|                            |                                                                                                                                                                                                                      |
|----------------------------|----------------------------------------------------------------------------------------------------------------------------------------------------------------------------------------------------------------------|
| Behavioural change methods | Techniques derived from behavioural theory that are used to influence determinants and support behaviour change (1).                                                                                                 |
| Change objectives          | Specification of what needs to change within specific determinants to achieve each performance objective. They represent the direct targets of the intervention (2).                                                 |
| Determinants               | Factors that influence a specific behaviour or environmental condition (2).                                                                                                                                          |
| Intervention Mapping       | An iterative process for addressing complex problems, consisting of six steps designed to create a blueprint for developing, implementing, and evaluating interventions (2).                                         |
| Logic Model of Change      | A model that defines what needs to change in both behaviour and environment, and how change can be achieved (2).                                                                                                     |
| Logic Model of the Problem | A descriptive and visual outline of the health issue, its impact on quality of life, and the behavioural and environmental causes that contribute to it (2).                                                         |
| Needs assessment           | The first step in the Intervention Mapping process. It involves identifying the key health problems, as well as the behavioural and environmental conditions and determinants that contribute to these problems (2). |
| Parameters for use         | The specific conditions that must be met for a behaviour change method to be effective (3).                                                                                                                          |
| Performance objectives     | Specification of the concrete actions that individuals need to take to bring about desired behavioural outcomes (2).                                                                                                 |
| Self-management            | An individual's ability to manage symptoms, treatment, lifestyle changes, and the psychological and physical consequences of a chronic condition (4).                                                                |
| Social facilitation        | The influence of social relationships on a person's ability to perform and sustain behaviours (5).                                                                                                                   |

## References

1. Kok G. A practical guide to effective behavior change: How to apply theory- and evidence-based behavior change methods in an intervention [Internet]. PsyArXiv; 2018 [geciteerd 6 augustus 2025]. Beschikbaar op: <https://osf.io/r78wh>
2. Eldredge LKB, Markham CM, Ruiter RA, Fernández ME, Kok G, Parcel GS. Planning health promotion programs: an intervention mapping approach. John Wiley & Sons.; 2016.
3. Kok G, Gottlieb NH, Peters GJY, Mullen PD, Parcel GS, Ruiter RAC, e.a. A taxonomy of behaviour change methods: an Intervention Mapping approach. Health Psychol Rev. 2 juli 2016;10(3):297-312.
4. Barlow J. How to use education as an intervention in osteoarthritis. Best Pract Res Clin Rheumatol. oktober 2001;15(4):545-58.
5. Zajonc RB. Social Facilitation: A solution is suggested for an old unresolved social psychological problem. Science. 16 juli 1965;149(3681):269-74.

**Supplementary table 1.** Matrix of change objectives for people with lipoedema

| Performance objectives                                                               | Personal determinants                                                                                                                                                                                                 |                                                                                     |                                                                             |                                                                    |                                                                                                              |
|--------------------------------------------------------------------------------------|-----------------------------------------------------------------------------------------------------------------------------------------------------------------------------------------------------------------------|-------------------------------------------------------------------------------------|-----------------------------------------------------------------------------|--------------------------------------------------------------------|--------------------------------------------------------------------------------------------------------------|
|                                                                                      | Knowledge                                                                                                                                                                                                             | Skills                                                                              | Self-Efficacy                                                               | Social facilitation                                                | Attitude                                                                                                     |
| PO.0. Decide to improve an aspect of life.                                           | K.0. Explain in which areas of their life improvement is possible.<br><br>K0.1. Explain the discrepancy between desired and current outcome.                                                                          |                                                                                     | SE.0. Express confidence in improving an aspect of their life.              |                                                                    | A.0. Express positive feelings of improving an aspect of their life.                                         |
| <i>Emotional control</i>                                                             |                                                                                                                                                                                                                       |                                                                                     |                                                                             |                                                                    |                                                                                                              |
| PO.1.a. Identify emotional responses and distress triggered by challenges, setbacks. | K.1.a.1. Explain the connection between emotions, distress and self-management.<br>K.1.a.2. Explain triggers for distress and emotions.<br>K.1.a.3. Explain methods for identifying emotional responses and distress. | S.1.a. Recognise emotional responses and distress effectively.                      | SE.1.a. Express confidence in recognizing emotional responses and distress. | SF.1.a. Discuss emotional challenges with supportive individuals*. | A.1.a. Express positive feelings about identifying emotional responses and distress triggered by challenges. |
| PO.1.b. Apply stress management and emotional regulation strategies.                 | K.1.b.1. Explain the benefits of stress management and emotional regulation.<br>K.1.b.2. Describe stress management and emotional regulation techniques.                                                              | S.1.b. Implement stress management and emotional regulation strategies effectively. | SE.1.b. Express confidence in managing stress and emotions.                 |                                                                    | A.1.b. Express positive feelings about applying stress management and emotional regulation strategies.       |

|                                                       |                                                                                                               |  |                                                          |                                                                                         |
|-------------------------------------------------------|---------------------------------------------------------------------------------------------------------------|--|----------------------------------------------------------|-----------------------------------------------------------------------------------------|
| PO.1.c. Seek social or emotional support when needed. | K.1.c.1. Explain the role of support in well-being.<br>K.1.c.2. Recognise when and from whom to seek support. |  | SF.1.c. Connect with supportive individuals for support. | A.1.c. Express positive feelings about seeking social or emotional support when needed. |
|-------------------------------------------------------|---------------------------------------------------------------------------------------------------------------|--|----------------------------------------------------------|-----------------------------------------------------------------------------------------|

---

*Goal setting*

|                                                                    |                                                                                                                                                                                                                                                                                                                                  |                                     |                                                        |                                                          |
|--------------------------------------------------------------------|----------------------------------------------------------------------------------------------------------------------------------------------------------------------------------------------------------------------------------------------------------------------------------------------------------------------------------|-------------------------------------|--------------------------------------------------------|----------------------------------------------------------|
| PO.2. Set at least one SMART goal related to lipoedema management. | K.2.1. Explain self-management, its behaviours, and its importance in dealing with lipoedema.<br>K.2.2. Explain evidence-based information on lipoedema, including the current state of science regarding incidence, prevalence, disease onset, physiology, and symptoms.<br>K.2.3. Identify the key components of a SMART goal. | S.2. Draft SMART goals effectively. | SE.2. Express confidence achieving the set SMART goal. | A.2. Express positive feelings about setting SMART goals |
|--------------------------------------------------------------------|----------------------------------------------------------------------------------------------------------------------------------------------------------------------------------------------------------------------------------------------------------------------------------------------------------------------------------|-------------------------------------|--------------------------------------------------------|----------------------------------------------------------|

---

*Self-monitoring*

|                                           |                                                |                                                       |                                                   |                                                                             |
|-------------------------------------------|------------------------------------------------|-------------------------------------------------------|---------------------------------------------------|-----------------------------------------------------------------------------|
| PO.2. Monitor self-management behaviours. | K.3. Explain methods for monitoring behaviour. | S.3. Demonstrate the ability to monitoring behaviour. | SE.3. Express confidence in monitoring behaviour. | A.3. Express positive feelings about monitoring self-management behaviours. |
|-------------------------------------------|------------------------------------------------|-------------------------------------------------------|---------------------------------------------------|-----------------------------------------------------------------------------|

---

---

*Reflective thinking*

|                                                                                                           |                                                                                                    |                                                    |                                                                   |                                                                                  |                                                           |
|-----------------------------------------------------------------------------------------------------------|----------------------------------------------------------------------------------------------------|----------------------------------------------------|-------------------------------------------------------------------|----------------------------------------------------------------------------------|-----------------------------------------------------------|
| PO.4.a. Reflect weekly on self-management behaviour to identify patterns and triggers affecting progress. | K.4.a.1. Identify techniques for effective reflection.<br>K.3.a.2. Describe patterns and triggers. | S.4.a. Reflect on challenges and successes.        | SE.4.a. Express confidence in analyzing behaviour.                | SF.4.a. Discuss challenges, successes, and patterns with supportive individuals. | A.4. Express positive feelings about reflective thinking. |
| PO.4.b. Use insights from reflection to improve future behaviours.                                        | K.4.b. Explain how challenges, successes and triggers impact behaviours.                           | S.4.b. Apply lessons learned to adjust behaviours. | SE.4.b. Express confidence in making changes based on reflection. | SF.4.b. Collaborate with supportive individuals to refine behaviours.            |                                                           |

---

*Decision-making*

|                                                                                               |                                                                                                                                                                                  |                                                                                |                                                                             |                                                                |                                                                                                                                |
|-----------------------------------------------------------------------------------------------|----------------------------------------------------------------------------------------------------------------------------------------------------------------------------------|--------------------------------------------------------------------------------|-----------------------------------------------------------------------------|----------------------------------------------------------------|--------------------------------------------------------------------------------------------------------------------------------|
| PO.5.a. Use evidence-based information to make informed decisions about lipoedema management. | K.5.a. Identify reliable evidence-based resources.                                                                                                                               | S.5.a. Search, evaluate, and interpret evidence-based information effectively. | SE.5.a. Express confidence in finding and using evidence-based information. |                                                                | A.5.a. Express positive feelings about using evidence-based information to make informed decisions about lipoedema management. |
| PO.5.b. Recognise treatment options and their impact on self-management goals.                | K.5.b.1. List evidence-based treatment options.<br>K.5.b.2. Describe the benefits and limitations of treatments.<br>K.5.b.3. Explain the impact of treatments on personal goals. | S.5.b. Assess and select appropriate treatments.                               | SE.5.b. Express confidence in evaluating treatment options.                 | SF.5.b. Discuss treatment options with supportive individuals. |                                                                                                                                |

---

---

*Planning and action*

|                                                                                                   |                                                                                                                      |                                              |                                                           |                                                                     |                                                                            |
|---------------------------------------------------------------------------------------------------|----------------------------------------------------------------------------------------------------------------------|----------------------------------------------|-----------------------------------------------------------|---------------------------------------------------------------------|----------------------------------------------------------------------------|
| PO.6.a. Create weekly action plans that integrate self-management behaviours into daily routines. | K.6.a.1. Identify components of an effective action plan.<br>K.6.a.2 Explain how behaviours fit into daily routines. | S.6.a. Organise goals into actionable steps. | SE.6.a. Express confidence in the developed action plans. | SF.6.a. Collaborate with supportive individuals to develop plans.   | A.6.a. Express positive feelings about creating action plans.              |
| PO.6.b. Build flexibility into plans to adapt to challenges.                                      | K.6.b.1. Identify scenarios requiring flexibility.<br>K.6.b.2. Describe strategies for adaptability.                 | S.6.b. Create specific backup plans.         | SE.6.b. Express confidence in adapting plans as needed.   | SF.6.b. Brainstorm flexible strategies with supportive individuals. | A.6.b. Express positive feelings about building in flexibility into plans. |

---

*Self-evaluation*

|                                                                                  |                                                                                                                   |                                                   |                                                     |                                                                               |                                                                                                   |
|----------------------------------------------------------------------------------|-------------------------------------------------------------------------------------------------------------------|---------------------------------------------------|-----------------------------------------------------|-------------------------------------------------------------------------------|---------------------------------------------------------------------------------------------------|
| PO.7.a. Assess monthly progress toward goals and action plans.                   | K.7.a.1. Explain the importance of regular progress assessment.<br>K.6.a.2. Explain tools for assessing progress. | S.7.a. Evaluate progress using appropriate tools. | SE.7.a. Express confidence in assessing progress.   | SF.7.a. Discuss progress with supportive individuals.                         | A.7.a. Express positive feelings about assessing progress toward goals and action plans.          |
| PO.7.b. Identify barriers, adjust strategies, and refine action plans as needed. | K.7.b.1. State barriers and areas needing improvement.                                                            | S.7.b.1. Create and implement revised plans.      | SE.7.b. Express confidence in adjusting strategies. | SF.7.b. Collaborate with supportive individuals to address gaps and barriers. | A.7.b. Express positive feelings about identifying barriers and adjusting strategies accordingly. |

---

*K, knowledge; PO, performance objective; S, skills; SE, self-efficacy; SF, social facilitation; SMART, specific, measurable, achievable, relevant, and time-bound; SN, social norms.*

*\* e.g. family, friends, healthcare professionals, peers, online support groups.*

**Supplementary table 2.** Matrix of change objectives for healthcare professionals (HCPs)

| Performance objectives                                                                                               | Personal determinants                                                                                                                                                                         |                                                                                                                                                                         |                                                                                                |
|----------------------------------------------------------------------------------------------------------------------|-----------------------------------------------------------------------------------------------------------------------------------------------------------------------------------------------|-------------------------------------------------------------------------------------------------------------------------------------------------------------------------|------------------------------------------------------------------------------------------------|
|                                                                                                                      | Knowledge                                                                                                                                                                                     | Skills                                                                                                                                                                  | Self-efficacy                                                                                  |
| PO.8. Educate individuals about lipoedema and self-management strategies tailored to personal goals.                 | K.8.1. Explain key characteristics of lipoedema.<br>K.8.2. Identify evidence-based self-management strategies.                                                                                |                                                                                                                                                                         |                                                                                                |
| PO.9. Assess and identify individuals' readiness for behavioural change and personal self-management goals.          | K.9.1. Explain the stages of the change model and its relevance to behavioural change.<br>K.9.2. Describe methods to assess and evaluate readiness for behavioural change and personal goals. | S.9. Use tailored strategies to evaluate readiness for behavioural change and personal goals.                                                                           | SE.9. Express confidence in assessing readiness for behavioural change and personal goals.     |
| PO.10. Collaborate with individual to set SMART self-management goals through mutual goal setting.                   | K.10.1. Explain the SMART framework and its relevance for self-management.<br>K.10.2. Describe the importance of mutual goal setting for self-management.                                     | S.10.1. Assist individuals in breaking down complex goals into actionable steps.<br>S.10.2. Facilitate mutual goal setting effectively.                                 | SE.10. Express confidence in guiding goal setting using the SMART framework.                   |
| PO.11. Assist individuals in creating structured, actionable plans for self-management using shared decision-making. | K.11.1. Explain the principles and importance of shared decision-making.<br>K.11.2. List components of a structured action plan.                                                              | S.11. Guide individuals in creating step-by-step action plans collaboratively.                                                                                          | SE.11. Express confidence in facilitating structured action plans.                             |
| PO.12. Monitor progress, provide feedback, and adjust strategies as needed.                                          | K.12.1. Identify evidence-based methods for progress monitoring.<br>K.12.2. Explain evidence-based feedback techniques.<br>K.12.3. Describe methods for strategy adjustment.                  | S.12.1. Implement evidence-based progress monitoring techniques.<br>S.12.2. Provide evidence-based feedback.<br>S.12.3. Adjust strategies using shared decision-making. | SE.12. Express confidence in monitoring progress, providing feedback, and strategy adjustment. |

|                                                                                                         |                                                                                                                                |                                                                                     |                                                           |
|---------------------------------------------------------------------------------------------------------|--------------------------------------------------------------------------------------------------------------------------------|-------------------------------------------------------------------------------------|-----------------------------------------------------------|
| PO.13. Ensure individuals can access tools, resources, and services to support self-management.         | K.13.1. List tools, resources, and services that support self-management.                                                      | S.13.1. Advise individuals on selecting appropriate tools, resources, and services. |                                                           |
| PO.14. Offer empathetic support to address emotional barriers to self-management.                       | K.14.1. Explain the impact of emotional barriers on self-management.<br>K.14.2. Identify methods to access emotional barriers. | S.14. Assess and address emotional barriers effectively.                            | SE.14. Express confidence in managing emotional barriers. |
| PO.15. Connect individuals to support groups, peer networks, or community resources for social support. | K.15.1. Explain the importance of social support.<br>K.15.2. List support groups, peer networks, or community resources.       |                                                                                     |                                                           |

---

*K, knowledge; PO, performance objective; S, skills; SE, self-efficacy; SMART, specific, measurable, achievable, relevant, and time-bound.*

**Supplementary table 3.** Performance objectives, personal determinants, change objectives, behaviour change methods and their application for people with lipoedema

| Performance objective                                                                | Personal determinant                                              | Change objective                                                       | Behavioural change method                   | Application                                                                                                                                                                                                                                                                                                                                                                                                                                                                                                                                                                                                                                                                                                                                                                                                                             |
|--------------------------------------------------------------------------------------|-------------------------------------------------------------------|------------------------------------------------------------------------|---------------------------------------------|-----------------------------------------------------------------------------------------------------------------------------------------------------------------------------------------------------------------------------------------------------------------------------------------------------------------------------------------------------------------------------------------------------------------------------------------------------------------------------------------------------------------------------------------------------------------------------------------------------------------------------------------------------------------------------------------------------------------------------------------------------------------------------------------------------------------------------------------|
| PO.0. Decide to improve an aspect of their life                                      | Knowledge                                                         | Explain in which areas of their life improvement is possible.          | Discussion<br>Active learning               | Group session <ul style="list-style-type: none"> <li>• Introduction and getting acquainted</li> <li>• The HCP provides information on lipoedema, symptoms, self-management, related behaviours, and their role in managing lipoedema.</li> </ul><br>Patient-HCP consultation <ul style="list-style-type: none"> <li>• The patient completes the Self-management Web, and the patient and HCP review the results together and identify key areas for improvement and discuss the patient's most significant barriers.</li> <li>• Motivational interviewing is used to enhance the patient's motivation and commitment to positive life changes, to assess patient's knowledge and beliefs about lipoedema and to evaluate the patient's readiness for behavioural change and explains its importance for overall functioning.</li> </ul> |
|                                                                                      |                                                                   | Explain the discrepancy between desired and current outcome.           | Feedback                                    |                                                                                                                                                                                                                                                                                                                                                                                                                                                                                                                                                                                                                                                                                                                                                                                                                                         |
|                                                                                      | Self-efficacy                                                     | Express confidence in improving an aspect of their life.               | Motivational interviewing                   |                                                                                                                                                                                                                                                                                                                                                                                                                                                                                                                                                                                                                                                                                                                                                                                                                                         |
| PO.1.a. Identify emotional responses and distress triggered by challenges, setbacks. | Knowledge                                                         | Explain the connection between emotions, distress and self-management. | Providing information<br>Advance organisers | Group session <ul style="list-style-type: none"> <li>• Provision of information on the connection between emotions, distress, and self-management, including triggers for distress and methods for identifying emotional responses.</li> <li>• Provision of information on the benefits of stress management and emotional regulation, including mindfulness, yoga, stress-trigger identification, and cognitive reframing.</li> </ul><br>Group discussion <ul style="list-style-type: none"> <li>• Facilitated by the HCP, focusing on emotional challenges and coping strategies with peers.</li> </ul>                                                                                                                                                                                                                               |
|                                                                                      |                                                                   | Explain triggers for distress and emotions.                            |                                             |                                                                                                                                                                                                                                                                                                                                                                                                                                                                                                                                                                                                                                                                                                                                                                                                                                         |
|                                                                                      | Explain methods for identifying emotional responses and distress. |                                                                        |                                             |                                                                                                                                                                                                                                                                                                                                                                                                                                                                                                                                                                                                                                                                                                                                                                                                                                         |
|                                                                                      | Social facilitation                                               | Discuss emotional challenges with supportive individuals.              | Enhancing network linkage                   |                                                                                                                                                                                                                                                                                                                                                                                                                                                                                                                                                                                                                                                                                                                                                                                                                                         |

|                                                                      |               |                                                                                                                                            |                                                            |                                                                                                                                                                                                                                                                                                                                                                            |
|----------------------------------------------------------------------|---------------|--------------------------------------------------------------------------------------------------------------------------------------------|------------------------------------------------------------|----------------------------------------------------------------------------------------------------------------------------------------------------------------------------------------------------------------------------------------------------------------------------------------------------------------------------------------------------------------------------|
|                                                                      | Attitude      | Express positive feelings about identifying emotional responses and distress triggered by challenges.                                      | Persuasive communications                                  | Interactive group workshop <ul style="list-style-type: none"> <li>Patients practice stress management techniques and emotional regulation strategies and discuss their experiences with the HCP and peers.</li> </ul>                                                                                                                                                      |
|                                                                      | Skills        | Recognise emotional responses and distress effectively.                                                                                    | Individualization<br>Self-monitoring of behaviour          | Reference document <ul style="list-style-type: none"> <li>The patient is provided with methods for identifying emotional responses and distress.</li> <li>The patient is provided with strategies for stress management and emotional regulation.</li> </ul>                                                                                                               |
|                                                                      | Self-efficacy | Express confidence in recognizing emotional responses and distress.                                                                        |                                                            |                                                                                                                                                                                                                                                                                                                                                                            |
| PO.1.b. Apply stress management and emotional regulation strategies. | Knowledge     | Explain the benefits of stress management and emotional regulation.<br><br>Describe stress management and emotional regulation techniques. | Providing information<br>Advance organisers                | Patient-HCP consultation <ul style="list-style-type: none"> <li>Discussion on emotional responses and distress. The patient records emotional triggers related to behavioural challenges in the Reference document.</li> <li>The HCP provides information on the role of support in well-being, followed by a discussion on when and from whom to seek support.</li> </ul> |
|                                                                      | Attitude      | Express positive feelings about applying stress management and emotional regulation strategies.                                            | Persuasive communications                                  |                                                                                                                                                                                                                                                                                                                                                                            |
|                                                                      | Skills        | Implement stress management and emotional regulation strategies effectively.                                                               | Improving physical and emotional states<br>Guided practice |                                                                                                                                                                                                                                                                                                                                                                            |
|                                                                      | Self-efficacy | Express confidence in managing stress and emotions.                                                                                        |                                                            |                                                                                                                                                                                                                                                                                                                                                                            |
| PO.1.c. Seek social or emotional support when needed.                | Knowledge     | Explain the role of support in well-being.<br><br>Recognise when and from whom to seek support.                                            | Providing information<br>Discussion                        |                                                                                                                                                                                                                                                                                                                                                                            |

|                                                                    |                                           |                                                                                                                                                                                                                                                                                                                     |                                           |                                                                                                                                                                                                                                                                                                                                                                                                                                                                                                                                                           |
|--------------------------------------------------------------------|-------------------------------------------|---------------------------------------------------------------------------------------------------------------------------------------------------------------------------------------------------------------------------------------------------------------------------------------------------------------------|-------------------------------------------|-----------------------------------------------------------------------------------------------------------------------------------------------------------------------------------------------------------------------------------------------------------------------------------------------------------------------------------------------------------------------------------------------------------------------------------------------------------------------------------------------------------------------------------------------------------|
|                                                                    | Social facilitation                       | Connect with supportive individuals for support.                                                                                                                                                                                                                                                                    | Enhancing network linkage                 |                                                                                                                                                                                                                                                                                                                                                                                                                                                                                                                                                           |
|                                                                    |                                           |                                                                                                                                                                                                                                                                                                                     | Public commitment                         |                                                                                                                                                                                                                                                                                                                                                                                                                                                                                                                                                           |
|                                                                    | Attitude                                  | Express positive feelings about seeking social or emotional support when needed.                                                                                                                                                                                                                                    | Persuasive communications                 |                                                                                                                                                                                                                                                                                                                                                                                                                                                                                                                                                           |
|                                                                    |                                           |                                                                                                                                                                                                                                                                                                                     | Believe selection                         |                                                                                                                                                                                                                                                                                                                                                                                                                                                                                                                                                           |
| PO.2. Set at least one SMART goal related to lipoedema management. | Knowledge                                 | Explain self-management, its behaviours, and its importance in dealing with lipoedema.<br><br>Explain evidence-based information on lipoedema, including the current state of science regarding incidence, prevalence, disease onset, physiology, and symptoms.<br><br>Identify the key components of a SMART goal. | Providing information                     | Patient-HCP consultation <ul style="list-style-type: none"> <li>Provision of information about lipoedema, SMART goal setting, its components, and the significance of goal setting.</li> <li>Demonstration of SMART goal setting.</li> <li>Motivational interviewing to enhance the patient's motivation and commitment to SMART goal setting, using the program Reference document to discuss the patient's SMART goals.</li> </ul> Reference document <ul style="list-style-type: none"> <li>The patient receives the presented information.</li> </ul> |
|                                                                    |                                           |                                                                                                                                                                                                                                                                                                                     | Chunking                                  |                                                                                                                                                                                                                                                                                                                                                                                                                                                                                                                                                           |
|                                                                    |                                           |                                                                                                                                                                                                                                                                                                                     | Advance organisers                        |                                                                                                                                                                                                                                                                                                                                                                                                                                                                                                                                                           |
|                                                                    | Skills                                    | Draft SMART goals.                                                                                                                                                                                                                                                                                                  | Goal setting                              |                                                                                                                                                                                                                                                                                                                                                                                                                                                                                                                                                           |
|                                                                    | Self-efficacy                             | Express confidence achieving the set SMART goal.                                                                                                                                                                                                                                                                    | Tailoring Demonstration                   |                                                                                                                                                                                                                                                                                                                                                                                                                                                                                                                                                           |
|                                                                    | Attitude                                  | Express positive feelings about setting SMART goals.                                                                                                                                                                                                                                                                | Motivational interviewing                 |                                                                                                                                                                                                                                                                                                                                                                                                                                                                                                                                                           |
|                                                                    | PO.3. Monitor self-management behaviours. | Knowledge                                                                                                                                                                                                                                                                                                           | Explain methods for monitoring behaviour. |                                                                                                                                                                                                                                                                                                                                                                                                                                                                                                                                                           |
| Skills                                                             |                                           | Demonstrate the ability to monitoring behaviour.                                                                                                                                                                                                                                                                    | Demonstration                             |                                                                                                                                                                                                                                                                                                                                                                                                                                                                                                                                                           |
| Self-efficacy                                                      |                                           | Express confidence in monitoring behaviour.                                                                                                                                                                                                                                                                         | Self-monitoring of behaviour              |                                                                                                                                                                                                                                                                                                                                                                                                                                                                                                                                                           |

|                                                                                                          |                                            |                                                                          |                                                                                                                                |                                                                                                                                                                                                                                                                                                                                                                                                                                        |
|----------------------------------------------------------------------------------------------------------|--------------------------------------------|--------------------------------------------------------------------------|--------------------------------------------------------------------------------------------------------------------------------|----------------------------------------------------------------------------------------------------------------------------------------------------------------------------------------------------------------------------------------------------------------------------------------------------------------------------------------------------------------------------------------------------------------------------------------|
|                                                                                                          | Attitude                                   | Express positive feelings about monitoring self-management behaviours.   | Consciousness raising                                                                                                          | Reference document <ul style="list-style-type: none"> <li>The patient receives information on behaviour monitoring methods.</li> </ul>                                                                                                                                                                                                                                                                                                 |
| PO.4.a Reflect weekly on self-management behaviour to identify patterns and triggers affecting progress. | Knowledge                                  | Identify techniques for effective reflection.                            | Providing information                                                                                                          | Group session <ul style="list-style-type: none"> <li>Provision of information on effective reflection methods and the importance of identifying patterns and triggers.</li> </ul>                                                                                                                                                                                                                                                      |
|                                                                                                          |                                            | Describe patterns and triggers.                                          | Active learning                                                                                                                |                                                                                                                                                                                                                                                                                                                                                                                                                                        |
|                                                                                                          | Social facilitation                        | Discuss challenges, successes, and patterns with supportive individuals. | Advance organisers                                                                                                             | Group discussion <ul style="list-style-type: none"> <li>Patients share and discuss successes, challenges, and triggers with peers.</li> <li>Patients explore behaviour refinements with guidance from the HCP.</li> </ul>                                                                                                                                                                                                              |
|                                                                                                          |                                            |                                                                          | Enhancing network linkage                                                                                                      |                                                                                                                                                                                                                                                                                                                                                                                                                                        |
|                                                                                                          | Skills                                     | Reflect on challenges and successes.                                     | Feedback                                                                                                                       |                                                                                                                                                                                                                                                                                                                                                                                                                                        |
| Self-efficacy                                                                                            | Express confidence in analyzing behaviour. | Self-monitoring of behaviour                                             | Reference document <ul style="list-style-type: none"> <li>The patient receives techniques for effective reflection.</li> </ul> |                                                                                                                                                                                                                                                                                                                                                                                                                                        |
|                                                                                                          | Attitude                                   | Express positive feelings about reflective thinking.                     | Belief selection                                                                                                               | Patient-HCP consultation <ul style="list-style-type: none"> <li>Discussion of patients' reflections on challenges, triggers, and successes, with feedback from the HCP.</li> <li>Exploration of how challenges, successes, and triggers impact behaviour, with feedback from the HCP.</li> <li>Development of solutions to address challenges and triggers, along with strategies to modify cues related to these triggers.</li> </ul> |
|                                                                                                          |                                            |                                                                          | Persuasive communication                                                                                                       |                                                                                                                                                                                                                                                                                                                                                                                                                                        |
| PO.4.b. Use insights from reflection to improve future behaviours.                                       | Knowledge                                  | Explain how challenges, successes and triggers impact behaviours.        | Feedback                                                                                                                       | Individual patient activity <ul style="list-style-type: none"> <li>Patients reflect on their own patterns and triggers affecting progress by writing them down in their Reference document.</li> </ul>                                                                                                                                                                                                                                 |
|                                                                                                          |                                            |                                                                          | Discussion                                                                                                                     |                                                                                                                                                                                                                                                                                                                                                                                                                                        |
|                                                                                                          | Skills                                     | Apply lessons learned to adjust behaviours.                              | Planning coping responses                                                                                                      |                                                                                                                                                                                                                                                                                                                                                                                                                                        |
|                                                                                                          | Self-efficacy                              | Express confidence in making changes based on reflection.                | Cue altering                                                                                                                   |                                                                                                                                                                                                                                                                                                                                                                                                                                        |
|                                                                                                          | Social facilitation                        | Collaborate with supportive individuals to refine behaviours.            | Enhancing network linkage                                                                                                      |                                                                                                                                                                                                                                                                                                                                                                                                                                        |
| PO.5.a. Use evidence-based information to make                                                           | Knowledge                                  | Identify reliable evidence-based resources.                              | Providing information                                                                                                          | Group session <ul style="list-style-type: none"> <li>Provision of information and demonstration on identifying reliable, evidence-based resources.</li> </ul>                                                                                                                                                                                                                                                                          |
|                                                                                                          |                                            |                                                                          | Chunking                                                                                                                       |                                                                                                                                                                                                                                                                                                                                                                                                                                        |

|                                                                                                   |                     |                                                                                                                         |                                   |                                                                                                                                                                                                                                                                                                                                                                                                                                                                                         |
|---------------------------------------------------------------------------------------------------|---------------------|-------------------------------------------------------------------------------------------------------------------------|-----------------------------------|-----------------------------------------------------------------------------------------------------------------------------------------------------------------------------------------------------------------------------------------------------------------------------------------------------------------------------------------------------------------------------------------------------------------------------------------------------------------------------------------|
| informed decisions about lipoedema management.                                                    | Skills              | Search, evaluate, and interpret evidence-based information effectively.                                                 | Guided practice<br>Demonstration  | <ul style="list-style-type: none"> <li>Provision of information on treatment options, including their limitations, benefits, and impact on personal goals.</li> </ul>                                                                                                                                                                                                                                                                                                                   |
|                                                                                                   | Self-efficacy       | Express confidence in finding and using evidence-based information.                                                     |                                   |                                                                                                                                                                                                                                                                                                                                                                                                                                                                                         |
|                                                                                                   | Attitude            | Express positive feelings about using evidence-based information to make informed decisions about lipoedema management. | Belief selection                  |                                                                                                                                                                                                                                                                                                                                                                                                                                                                                         |
| PO.5.b. Recognise treatment options and their impact on self-management goals.                    | Knowledge           | List evidence-based treatment options.                                                                                  | Providing information             | <ul style="list-style-type: none"> <li>Group discussion <ul style="list-style-type: none"> <li>Patients discuss appropriate treatment options.</li> </ul> </li> <li>Interactive group workshop <ul style="list-style-type: none"> <li>Patients practice searching for, evaluating, and interpreting evidence-based information, guided by the HCP.</li> <li>Patients assess and select appropriate treatment options through discussions with the HCP and peers.</li> </ul> </li> </ul> |
|                                                                                                   |                     | Describe the benefits and limitations of treatments.                                                                    |                                   |                                                                                                                                                                                                                                                                                                                                                                                                                                                                                         |
|                                                                                                   |                     | Explain the impact of treatments on personal goals.                                                                     |                                   |                                                                                                                                                                                                                                                                                                                                                                                                                                                                                         |
|                                                                                                   | Skills              | Assess and select appropriate treatments.                                                                               | Guided practice<br>Tailoring      |                                                                                                                                                                                                                                                                                                                                                                                                                                                                                         |
|                                                                                                   | Self-efficacy       | Express confidence in evaluating treatment options.                                                                     |                                   |                                                                                                                                                                                                                                                                                                                                                                                                                                                                                         |
|                                                                                                   | Social facilitation | Discuss treatment options with supportive individuals.                                                                  | Discussion                        |                                                                                                                                                                                                                                                                                                                                                                                                                                                                                         |
| PO.6.a. Create weekly action plans that integrate self-management behaviours into daily routines. | Knowledge           | Identify components of an effective action plan.                                                                        | Providing information<br>Chunking | <ul style="list-style-type: none"> <li>Group session <ul style="list-style-type: none"> <li>Provision of information on the components of an effective action plan, strategies for integrating behaviours into daily routines, and strategies for adaptability.</li> </ul> </li> </ul>                                                                                                                                                                                                  |
|                                                                                                   |                     | Explain how behaviours fit into daily routines.                                                                         |                                   |                                                                                                                                                                                                                                                                                                                                                                                                                                                                                         |
|                                                                                                   | Social facilitation | Collaborate with supportive individuals to develop plans.                                                               | Enhancing network linkage         |                                                                                                                                                                                                                                                                                                                                                                                                                                                                                         |

|                                                                |                     |                                                                     |                                        |                                                                                                                                                                                                                                                                                                                                                                                                                                                                    |
|----------------------------------------------------------------|---------------------|---------------------------------------------------------------------|----------------------------------------|--------------------------------------------------------------------------------------------------------------------------------------------------------------------------------------------------------------------------------------------------------------------------------------------------------------------------------------------------------------------------------------------------------------------------------------------------------------------|
|                                                                | Attitude            | Express positive feelings about creating action plans.              | Persuasive communication               | <p>Group discussion</p> <ul style="list-style-type: none"> <li>Facilitated by the HCP, patients discuss their plans and provide feedback to one another.</li> <li>Patients, guided by the HCP, brainstorm flexible strategies and explore how to incorporate them into their plans.</li> </ul> <p>Reference document</p> <ul style="list-style-type: none"> <li>Patients prepare possible scenarios requiring flexibility and corresponding strategies.</li> </ul> |
|                                                                | Skills              | Organise goals into actionable steps.                               | Goal setting                           |                                                                                                                                                                                                                                                                                                                                                                                                                                                                    |
|                                                                | Self-efficacy       | Express confidence in the developed action plans.                   | Motivational Interviewing<br>Tailoring |                                                                                                                                                                                                                                                                                                                                                                                                                                                                    |
| PO.6.b. Build flexibility into plans to adapt to challenges.   | Knowledge           | Identify scenarios requiring flexibility.                           | Providing information                  | <p>Patient-HCP consultation</p> <ul style="list-style-type: none"> <li>Encouragement and guidance to help the patient integrate behaviours into their daily routine.</li> <li>Creation of a weekly goal setting sheet in the patient's Reference document, including a clear definition of the behaviour.</li> <li>Encouragement for the patient to develop specific backup plans to address potential challenges.</li> </ul>                                      |
|                                                                |                     | Describe strategies for adaptability.                               | Discussion                             |                                                                                                                                                                                                                                                                                                                                                                                                                                                                    |
|                                                                | Social facilitation | Brainstorm flexible strategies with supportive individuals.         | Enhancing network linkage              |                                                                                                                                                                                                                                                                                                                                                                                                                                                                    |
|                                                                | Attitude            | Express positive feelings about building in flexibility into plans. | Persuasive communications              |                                                                                                                                                                                                                                                                                                                                                                                                                                                                    |
|                                                                | Skills              | Create specific backup plans.                                       | Planning coping responses              |                                                                                                                                                                                                                                                                                                                                                                                                                                                                    |
|                                                                | Self-efficacy       | Express confidence in adapting plans as needed.                     | Tailoring                              |                                                                                                                                                                                                                                                                                                                                                                                                                                                                    |
| PO.7.a. Assess monthly progress toward goals and action plans. | Knowledge           | Explain the importance of regular progress assessment.              | Providing information                  | <p>Group session</p> <ul style="list-style-type: none"> <li>The HCP provides information and a demonstration on the importance of regular self-evaluation and tools for self-evaluation.</li> </ul>                                                                                                                                                                                                                                                                |
|                                                                |                     | Explain tools for assessing progress.                               | Advance organisers                     |                                                                                                                                                                                                                                                                                                                                                                                                                                                                    |

|                                                                                  |                     |                                                                                            |                              |                                                                                                                                                                                                                                                                                                                                                                                                                                                                                                                                                                                |
|----------------------------------------------------------------------------------|---------------------|--------------------------------------------------------------------------------------------|------------------------------|--------------------------------------------------------------------------------------------------------------------------------------------------------------------------------------------------------------------------------------------------------------------------------------------------------------------------------------------------------------------------------------------------------------------------------------------------------------------------------------------------------------------------------------------------------------------------------|
|                                                                                  | Skills              | Evaluate progress using appropriate tools.                                                 | Guided practice              | <p>Group discussion</p> <ul style="list-style-type: none"> <li>Facilitated by the HCP, focusing on reviewing and discussing progress.</li> <li>Patients, guided by the HCP, discuss barriers to desired behaviours.</li> </ul>                                                                                                                                                                                                                                                                                                                                                 |
|                                                                                  | Self-efficacy       | Express confidence in assessing progress.                                                  | Demonstration                |                                                                                                                                                                                                                                                                                                                                                                                                                                                                                                                                                                                |
|                                                                                  | Social facilitation | Discuss progress with supportive individuals.                                              | Enhancing network linkage    |                                                                                                                                                                                                                                                                                                                                                                                                                                                                                                                                                                                |
|                                                                                  | Attitude            | Express positive feelings about assessing progress toward goals and action plans.          | Persuasive communications    |                                                                                                                                                                                                                                                                                                                                                                                                                                                                                                                                                                                |
| PO.7.b. Identify barriers, adjust strategies, and refine action plans as needed. | Knowledge           | State barriers and areas needing improvement.                                              | Tailoring                    | <p>Interactive group workshop</p> <ul style="list-style-type: none"> <li>Patients practice using progress assessment tools to analyse their progress toward a SMART goal.</li> </ul> <p>Reference document</p> <ul style="list-style-type: none"> <li>The patient is provided with tools for assessing progress.</li> </ul> <p>Patient-HCP consultation</p> <ul style="list-style-type: none"> <li>Discussion on perceived barriers and areas for improvement.</li> <li>Collaborative creation and implementation of revised plans to overcome identified barriers.</li> </ul> |
|                                                                                  | Skills              | Create and implement revised plans.                                                        | Self-monitoring of behaviour |                                                                                                                                                                                                                                                                                                                                                                                                                                                                                                                                                                                |
|                                                                                  | Self-efficacy       | Express confidence in adjusting strategies.                                                | Planning coping responses    |                                                                                                                                                                                                                                                                                                                                                                                                                                                                                                                                                                                |
|                                                                                  | Attitude            | Express positive feelings about identifying barriers and adjusting strategies accordingly. | Reinforcement                |                                                                                                                                                                                                                                                                                                                                                                                                                                                                                                                                                                                |
|                                                                                  | Social facilitation | Collaborate with supportive individuals to address gaps and barriers.                      | Enhancing network linkage    |                                                                                                                                                                                                                                                                                                                                                                                                                                                                                                                                                                                |

*HCP, healthcare professional; PO, performance objective; SMART, specific, measurable, achievable, relevant, and time-bound.*

**Supplementary table 4.** Performance objectives, personal determinants, change objectives, behaviour change methods and their application for healthcare professionals

| <b>Performance objective</b>                                                                                | <b>Personal determinant</b> | <b>Change objective</b>                                                                      | <b>Behavioural change method</b> | <b>Practical application</b>                                                                                                                                                                                                                                                                                                                                                                                                                                                                                                                 |
|-------------------------------------------------------------------------------------------------------------|-----------------------------|----------------------------------------------------------------------------------------------|----------------------------------|----------------------------------------------------------------------------------------------------------------------------------------------------------------------------------------------------------------------------------------------------------------------------------------------------------------------------------------------------------------------------------------------------------------------------------------------------------------------------------------------------------------------------------------------|
| PO.8. Educate individuals about lipoedema and self-management strategies tailored to personal goals.        | Knowledge                   | Explain key characteristics of lipoedema.                                                    | Providing information            | Group session <ul style="list-style-type: none"> <li>Provision of information about the key characteristics of lipoedema, evidence-based self-management strategies, and ways to tailor these strategies to patients' personal goals.</li> </ul> Reference document <ul style="list-style-type: none"> <li>The HCP is provided with a reference document containing the information and is instructed to write down key takeaways after the session.</li> </ul>                                                                              |
|                                                                                                             |                             | Identify evidence-based self-management strategies.                                          | Chunking<br>Advance organisers   |                                                                                                                                                                                                                                                                                                                                                                                                                                                                                                                                              |
| PO.9. Assess and identify individuals' readiness for behavioural change and personal self-management goals. | Knowledge                   | Explain the stages of the change model and its relevance to behavioural change.              | Providing information            | Group session <ul style="list-style-type: none"> <li>Provision of information on the stages of the Transtheoretical Model of Behaviour Change, its relevance to behavioural change, and how to assess and evaluate patients' readiness.</li> </ul>                                                                                                                                                                                                                                                                                           |
|                                                                                                             |                             | Describe methods to assess and evaluate readiness for behavioural change and personal goals. | Advance organisers               |                                                                                                                                                                                                                                                                                                                                                                                                                                                                                                                                              |
|                                                                                                             | Skills                      | Use tailored strategies to evaluate readiness for behavioural change and personal goals.     | Guided practice<br>Feedback      | Interactive workshop <ul style="list-style-type: none"> <li>Practicing the assessment of an individual's readiness for behavioural change, evaluating the findings, and discussing them with peers through role-play. HCPs provide feedback to one another.</li> </ul> Reference document <ul style="list-style-type: none"> <li>The HCP is provided with a reference document containing methods for assessing and evaluating readiness for behavioural change and are instructed to write down key takeaways after the session.</li> </ul> |
|                                                                                                             | Self-efficacy               | Express confidence in assessing readiness for behavioural change and personal goals.         |                                  |                                                                                                                                                                                                                                                                                                                                                                                                                                                                                                                                              |
| PO.10. Collaborate with individual to set SMART self-management goals                                       | Knowledge                   | Explain the SMART framework and its relevance for self-management.                           | Providing information            | Group session <ul style="list-style-type: none"> <li>Providing information about the SMART framework for goal setting, its relevance to self-management, and the importance of mutual goal setting.</li> </ul>                                                                                                                                                                                                                                                                                                                               |

|                                                                                                                      |               |                                                                                                                          |                                                  |                                                                                                                                                                                                                                                                                                                                                                      |
|----------------------------------------------------------------------------------------------------------------------|---------------|--------------------------------------------------------------------------------------------------------------------------|--------------------------------------------------|----------------------------------------------------------------------------------------------------------------------------------------------------------------------------------------------------------------------------------------------------------------------------------------------------------------------------------------------------------------------|
| through mutual goal setting.                                                                                         |               | Describe the importance of mutual goal setting for self-management.                                                      |                                                  | <ul style="list-style-type: none"> <li>Providing information on the principles and significance of shared decision-making, as well as the components of a structured action plan.</li> </ul>                                                                                                                                                                         |
|                                                                                                                      | Skills        | Assist individuals in breaking down complex goals into actionable steps.                                                 | Guided practice<br>Self-monitoring of behaviour. | Interactive workshop <ul style="list-style-type: none"> <li>Practicing motivational interviewing and mutual goal setting with peers to develop individual SMART goals.</li> <li>Creating step-by-step action plans using shared decision-making through role-play, peer observation, and feedback.</li> <li>Audio-recording sessions for self-evaluation.</li> </ul> |
|                                                                                                                      | Self-efficacy | Facilitate mutual goal setting effectively.<br>Express confidence in guiding goal setting using the SMART framework.     |                                                  | Reference document                                                                                                                                                                                                                                                                                                                                                   |
| PO.11. Assist individuals in creating structured, actionable plans for self-management using shared decision-making. | Knowledge     | Explain the principles and importance of shared decision-making.                                                         | Providing information                            | <ul style="list-style-type: none"> <li>The HCP is instructed to write down key takeaways after the session.</li> </ul>                                                                                                                                                                                                                                               |
|                                                                                                                      | Skills        | List components of a structured action plan.<br>Guide individuals in creating step-by-step action plans collaboratively. | Guided practice<br>Feedback                      |                                                                                                                                                                                                                                                                                                                                                                      |
|                                                                                                                      | Self-efficacy | Express confidence in facilitating structured action plans.                                                              |                                                  |                                                                                                                                                                                                                                                                                                                                                                      |
| PO.12. Monitor progress, provide feedback, and adjust strategies as needed.                                          | Knowledge     | Identify evidence-based methods for progress monitoring.                                                                 | Providing information                            | Group session <ul style="list-style-type: none"> <li>Provision of information on evidence-based progress monitoring methods, feedback techniques, and strategy adjustment.</li> <li>Discussion of the presented information.</li> </ul>                                                                                                                              |
|                                                                                                                      |               | Explain evidence-based feedback techniques.<br>Describe methods for strategy adjustment.                                 | Advance organisers                               | Interactive workshop <ul style="list-style-type: none"> <li>Practicing the use of monitoring tools with peers and discussing how to effectively integrate them into consultations.</li> </ul>                                                                                                                                                                        |
|                                                                                                                      | Skills        | Implement evidence-based progress monitoring techniques.                                                                 | Guided practice                                  |                                                                                                                                                                                                                                                                                                                                                                      |

|                                                                                                 |               |                                                                                         |                       |                                                                                                                                                                                                                |
|-------------------------------------------------------------------------------------------------|---------------|-----------------------------------------------------------------------------------------|-----------------------|----------------------------------------------------------------------------------------------------------------------------------------------------------------------------------------------------------------|
|                                                                                                 |               | Provide evidence-based feedback.                                                        |                       | <ul style="list-style-type: none"> <li>Role-play simulations where HCPs discuss adjustments to patients' plans using shared decision-making.</li> </ul>                                                        |
|                                                                                                 |               | Adjust strategies using shared decision-making.                                         |                       | Reference document                                                                                                                                                                                             |
|                                                                                                 | Self-efficacy | Express confidence in monitoring progress, providing feedback, and strategy adjustment. |                       | <ul style="list-style-type: none"> <li>HCPs are provided with a reference document containing methods for strategy adjustment and are instructed to document key takeaways after the session.</li> </ul>       |
| PO.13. Ensure individuals can access tools, resources, and services to support self-management. | Knowledge     | List tools, resources, and services that support self-management.                       | Providing information | Group session                                                                                                                                                                                                  |
|                                                                                                 | Skills        | Advise individuals on selecting appropriate tools, resources, and services.             | Guided practice       | <ul style="list-style-type: none"> <li>Provision of information on available tools, resources, and services that support self-management, as well as how to access them.</li> </ul>                            |
|                                                                                                 |               |                                                                                         |                       | Interactive workshop                                                                                                                                                                                           |
|                                                                                                 |               |                                                                                         |                       | <ul style="list-style-type: none"> <li>Practicing the identification of tools, resources, and services based on a patient case.</li> </ul>                                                                     |
|                                                                                                 |               |                                                                                         |                       | Reference document                                                                                                                                                                                             |
|                                                                                                 |               |                                                                                         |                       | <ul style="list-style-type: none"> <li>HCPs are instructed to write down key takeaways after the session.</li> </ul>                                                                                           |
| PO.14. Offer empathetic support to address emotional barriers to self-management.               | Knowledge     | Explain the impact of emotional barriers on self-management.                            | Providing information | Group session                                                                                                                                                                                                  |
|                                                                                                 |               | Identify methods to access emotional barriers.                                          |                       | <ul style="list-style-type: none"> <li>Providing information on the impact of emotional barriers on self-management, methods for assessing these barriers, and the importance of social support.</li> </ul>    |
|                                                                                                 | Skills        | Assess and address emotional barriers effectively.                                      | Guided practice       | Group discussion                                                                                                                                                                                               |
|                                                                                                 | Self-efficacy | Express confidence in managing emotional barriers.                                      | Feedback              | <ul style="list-style-type: none"> <li>Discussing potential support groups, peer networks, and community resources, and sharing personal experiences of connecting patients to supportive networks.</li> </ul> |
|                                                                                                 |               |                                                                                         | Advance organisers    |                                                                                                                                                                                                                |
| PO.15. Connect individuals to support groups, peer networks, or community                       | Knowledge     | Explain the importance of social support.                                               | Providing information | Interactive workshop                                                                                                                                                                                           |
|                                                                                                 |               | List support groups, peer                                                               | Discussion            | <ul style="list-style-type: none"> <li>Practicing how to address emotional barriers with peers through role-play, peer observation, and feedback.</li> </ul>                                                   |

---

resources for social support.

networks, or community resources.

Reference document

- HCPs receive methods for assessing and addressing emotional barriers and are instructed to write down key takeaways after the session.

---

*HCP, healthcare professional; PO, performance objective; SMART, specific, measurable, achievable, relevant, and time-bound.*
